# Supplementary material for: Metabolic cost calculations of gait using musculoskeletal energy models, a comparison study
Source: PubMed Central journal article supplement (PMC6750598; doi:10.1371/journal.pone.0222037), 2019-09-18
Supplement: pone.0222037.s002.pdf [file pone.0222037.s002.pdf]

## S2: Muscle Model

Fig. S2.1 shows the three element Hill-type muscle that was used in this work. It consists of a contractile element, parallel elastic element and series elastic element. Its input is the stimulation,  $u$ , and the states are the activation,  $a$ , and the contractile element length,  $l_{CE}$ . The force in the contractile element is determined as follows:

$$F_{CE} = af(l_{CE})g(v_{CE})F_{max} \quad (1)$$

where  $f(l_{CE})$  is the force-length relationship, and  $g(v_{CE})$  is the force-velocity relationship.

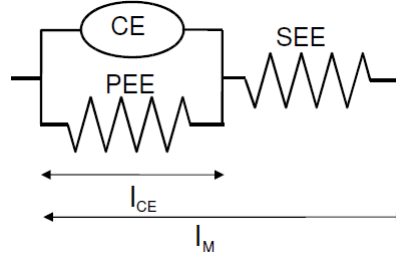

**Fig S2.1. Three element Hill-type muscle with contractile element, parallel elastic element, and series elastic element.**

The force-length relationship was as follows:

$$f(l_{CE}) = \exp\left(\frac{-(l_{CE} - l_{CE(OPT)})^2}{(Wl_{CE(OPT)})^2}\right) \quad (2)$$

The force-velocity equation was defined as follows:

$$g(v_{CE}) = \begin{cases} \frac{v_{CE(max)} + v_{CE}}{v_{CE(max)} - v_{CE}/A_{hill}} & \text{if } v_{CE} < 0 \\ \frac{g_{max}v_{CE} + c}{v_{CE} + c} & \text{if } v_{CE} \geq 0 \end{cases} \quad (3)$$

$$\text{with } c = \frac{v_{CE(max)}A_{hill}(g_{max} - 1)}{A_{hill} + 1} \quad (4)$$

The parallel and series elastic elements are modeled as quadratic springs. Their force are found based on the model presented by McLean et al. [1]:

$$F(l) = \begin{cases} k_1(l - l_{slack}) & \text{if } l \leq l_{slack} \\ k_1(l - l_{slack}) + k_2(l - l_{slack})^2 & \text{if } l > l_{slack} \end{cases} \quad (5)$$

where  $l$  denotes the length of the element and  $l_{slack}$  the slack length.  $k_1$  and  $k_2$  are stiffness constants.  $k_1 = 0.01 F_{max}/m$  represents a small linear stiffness, which was added to aid the optimization. It is equal to.  $k_2$  is equal to the following:

$$k_2(PEE) = \frac{F_{max}k_{PEE}}{l_{CE(OPT)}^2} \quad (6)$$

$$k_2(SEE) = \frac{F_{max}}{(u_{max}l_{CE(OPT)})^2} \quad (7)$$

where  $k_{PEE} = 1$  and  $u_{max} = 0.04$  are dimensionless constants.

The muscle mass,  $m_{mus}$  was determined using the maximum isometric force and the optimal fiber length:

$$m_{mus} = \frac{F_{max}}{\sigma} \rho l_{CE(OPT)} \quad (8)$$

where  $\sigma = 25 \text{ N/cm}^2$  is the muscle-specific stress [2] and  $\rho = 1059.7 \text{ kg/m}^3$  is the density of muscle.

Tab. S2.1 shows the maximum isometric force  $F_{max}$ , optimal fiber length,  $l_{CE(OPT)}$ , width of the force-length curve, the slack length of the parallel elastic element (PEE) and the series elastic element (SEE), the nominal muscle length,  $l_m$ , and the percentage of fast twitch fibers for each muscle. Several parameters parameters for each muscle. Several parameters were the same for each muscle, the activation time,  $T_{act} = 0.01 \text{ s}$ , the deactivation time,  $T_{deact} = 0.03 \text{ s}$ , the maximum shortening velocity,  $v_{CE(max)} = 12 l_{CE(OPT)}/\text{s}$ , the maximum force during lengthening,  $g_{max} = 1.5 F_{max}$ , and the normalized hill constant,  $A_{hill} = 0.25$ .

**Table S2.1. Muscle Parameters**

| Muscle            | $F_{max}[N]$ | $l_{CE(OPT)}$ [m] | Width | PEE slack<br>[ $l_{CE(OPT)}$ ] | SEE slack [m] | $l_m$ [m] | % FT fibers |
|-------------------|--------------|-------------------|-------|--------------------------------|---------------|-----------|-------------|
| Iliopsoas         | 1500         | 0.102             | 1.298 | 1.2                            | 0.142         | 0.248     | 0.5         |
| Gluteals          | 3000         | 0.2               | 0.625 | 1.2                            | 0.157         | 0.271     | 0.45        |
| Hamstrings        | 3000         | 0.104             | 1.197 | 1.2                            | 0.334         | 0.383     | 0.35        |
| Rectus Femoris    | 1200         | 0.081             | 1.443 | 1.4                            | 0.398         | 0.474     | 0.65        |
| Vastus            | 7000         | 0.093             | 0.627 | 1.4                            | 0.223         | 0.271     | 0.5         |
| Gastrocnemius     | 3000         | 0.055             | 1.039 | 1.2                            | 0.42          | 0.487     | 0.5         |
| Soleus            | 4000         | 0.055             | 1.039 | 1.2                            | 0.245         | 0.284     | 0.2         |
| Tibialis Anterior | 2500         | 0.082             | 0.442 | 1.2                            | 0.317         | 0.381     | 0.25        |

## References

1. McLean S, Su A, van den Bogert A. Development and validation of a 3-D model to predict knee joint loading during dynamic movement. *Journal of Biomechanical Engineering*. 2003;125(6):864–874.
2. Nigg BM, Herzog W. *Biomechanics of the musculo-skeletal system*. John Wiley & Sons; 2007.
