# Supplementary material for: Metabolic cost calculations of gait using musculoskeletal energy models, a comparison study
Source: PubMed Central journal article supplement (PMC6750598; doi:10.1371/journal.pone.0222037), 2019-09-18
Supplement: pone.0222037.s003.pdf [file pone.0222037.s003.pdf]

**Table S1: Marker description**

| No. | Name  | Position                             |
|-----|-------|--------------------------------------|
| 1   | T10   | 10th thoracic vertebrae              |
| 2   | SACR  | Sacrum bone                          |
| 3   | NAVE  | Navel                                |
| 4   | XYPh  | Xyphoid process                      |
| 5   | STRN  | Sternum                              |
| 6   | LASIS | Pelvic bone left front               |
| 7   | RASIS | Pelvic bone right front              |
| 8   | LPSIS | Pelvic bone left back                |
| 9   | RPSIS | Pelvic bone right back               |
| 10  | LGTRO | Left greater trochanter of femur     |
| 11  | FLTHI | Left thigh                           |
| 12  | LLEK  | Left lateral epicondyle of the knee  |
| 13  | LATI  | Left anterior of the tibia           |
| 14  | LLM   | Left lateral malleolus of the ankle  |
| 15  | LHEE  | Left heel                            |
| 16  | LTOE  | Left toe                             |
| 17  | LMT5  | Left 5th metatarsal                  |
| 18  | RGTRO | Right trochanter major of the femur  |
| 19  | FRTHI | Right thigh                          |
| 20  | RLEK  | Right lateral epicondyle of the knee |
| 21  | RATI  | Right anterior of the tibia          |
| 22  | RLM   | Right lateral malleolus of the ankle |
| 23  | RHEE  | Right heel                           |
| 24  | RTOE  | Right toe                            |
| 25  | RMT5  | Right 5th metatarsal                 |
| 26  | LSHO  | Left Shoulder                        |
| 27  | RSHO  | Right Shoulder                       |
