# Supplementary material for: Metabolic cost calculations of gait using musculoskeletal energy models, a comparison study
Source: PubMed Central journal article supplement (PMC6750598; doi:10.1371/journal.pone.0222037), 2019-09-18
Supplement: pone.0222037.s004.pdf [file pone.0222037.s004.pdf]

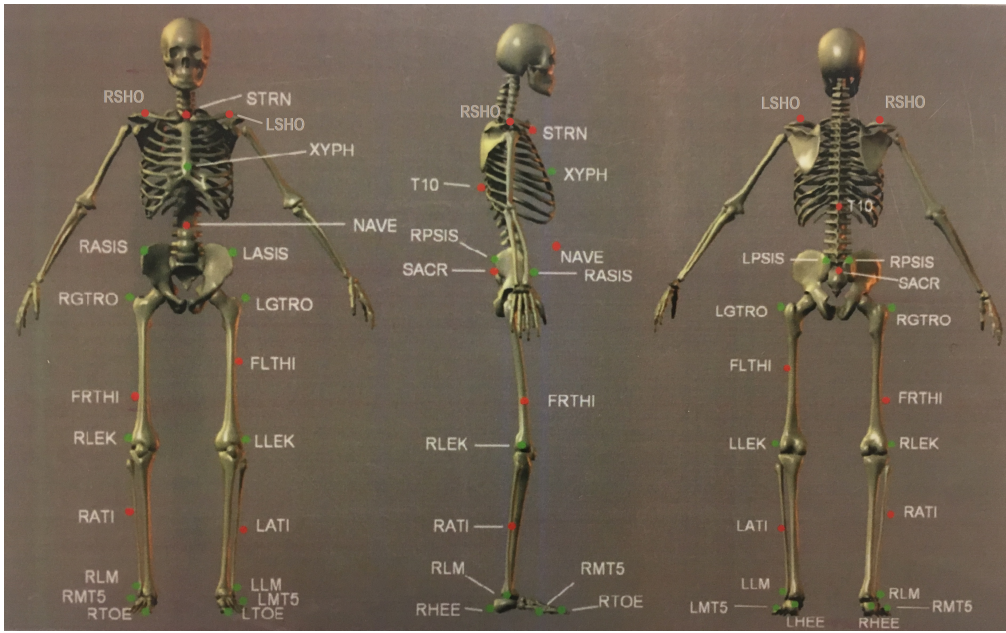

**Fig S1: Placement of markers on the body**
